1 **Title page**

2

3 *A gender comparison of the psychological distress of medical students in Nigeria during the*  
4 *Coronavirus pandemic: A cross-sectional survey.*

5

6 Oluwaseun Mercy Idowu<sup>1¶\*</sup>, OyinOluwa Gloria Adaramola<sup>1¶</sup>, Boluwatife Samson Aderounmu<sup>2</sup>,  
7 Ifeoluwa Delight Olugbamigbe<sup>2</sup>, Olaoluwa Ezekiel Dada<sup>2</sup>, Adeyinka Christopher Osifeso<sup>3</sup>,  
8 Oluseun Peter Ogunnubi<sup>4</sup>, Oluwakemi Ololade Odukoya<sup>5</sup>

9 <sup>1</sup>College of Medicine, University of Lagos, Nigeria

10 <sup>2</sup>College of Medicine, University of Ibadan, Nigeria

11 <sup>3</sup>Lagos University Teaching Hospital, Nigeria

12 <sup>4</sup>Department of Psychiatry, College of Medicine, University of Lagos, Nigeria

13 <sup>5</sup>Department of Community Health and Primary Care, College of Medicine, University of Lagos,  
14 Nigeria

15 \*Corresponding author

16 E-mail: [seunidowu07@gmail.com](mailto:seunidowu07@gmail.com) (OM)

17 ORCID: 0000-0001-9544-4824

18 ¶OM and OG are Joint Senior Authors

## 19 **Abstract**

20 **Background:** The Coronavirus disease (COVID-19) pandemic as a large scale stressor could  
21 have negative distress on the mental health on medical students. Since gender differences in  
22 mental health may exist between males and females, it would prove interesting to see if a large  
23 scale stressor such as the pandemic will cause variances in the psychological distress between  
24 both genders. This study assessed and compared the psychological distress of COVID-19 among  
25 male and female medical students in medical schools in South-Western Nigeria

26 **Materials and methods:** A cross-sectional online survey using was carried out among 1010  
27 medical students from three largest universities in south western Nigeria during the COVID-19  
28 pandemic. The respondents were purposively selected, data was obtained on participants  
29 demographic and psychological distress was assessed using the General Health Questionnaire 12  
30 (GHQ-12). Data was analyzed using the SPSS version 21 statistical software, chi square was  
31 used to assess gender differences, multivariate regression analysis assessed the predictors of  
32 psychological distress among both genders and p values less than 0.05 were considered  
33 significant.

34 **Results:** Female medical students are at a higher risk of psychological distress compared to their  
35 male counterparts ( $p < 0.005$ ). Females were almost twice at risk of psychological distress during  
36 the COVID-19 pandemic than males (OR=1.534, 95% CI=1.003-2.345,  $p=0.003$ ). Females with a positive history  
37 of mental illness were five times more at risk of psychological distress during the COVID-19  
38 pandemic compared to females with no previous mental health history (OR=5.102, 95% CI=1.002-26.102,  $p=0.002$ )

39 **Conclusion:** Females were at higher risk of psychological distress compared to male students.  
40 Gender specific interventions addressing psychological distress among medical students are  
41 recommended.

42 **Keywords:** Psychological distress, psychological impact, gender, COVID-19, medical students.

43

44

## 45 **Introduction**

46 The Coronavirus disease 2019 (COVID-19) is caused by the severe acute respiratory syndrome  
47 coronavirus-2 (SARS-CoV2), which is highly transmissible and has been a cause for worldwide  
48 concern [1]. Since the outbreak of COVID-19 in Wuhan, China in December 2019 [2], the virus  
49 has expressed high rates of rapid transmission. It was declared a pandemic on the 11<sup>th</sup> March,  
50 2020 after more than 118,319 confirmed cases and 4,292 deaths had been recorded from various  
51 continents of the world [3]. Shortly before this declaration, Nigeria, the most populous country in  
52 Africa, recorded her first case on the 27<sup>th</sup> February, 2020 [4]. As at the 24<sup>th</sup> of October 2020,  
53 Nigeria had a total of 61,930 confirmed cases with 1,129 deaths. Almost half (49%) of these  
54 cases are in south-west states of the country [5].

55 According to the World Health Organization (WHO) mental health is "a state of well-being in  
56 which the individual realizes his or her own abilities, can cope with the normal stresses of life,  
57 can work productively and is able to make a contribution to his or her community" [6].

58 A person's mental health is influenced by social and economic conditions like family, school and  
59 social support among other factors [7]. It is widely believed that social ties play a positive part in

60 the preservation of one's mental health [8]. In a bid to curb the spread of the COVID-19 there  
61 has been a disruption in social life due to the advent of measures like social distancing, lockdown,  
62 self-isolation and quarantine. Apart from the social distancing, there is also the possibility of fear  
63 and uncertainty in the hearts of many concerning the novel coronavirus which may pose a risk to  
64 their mental health [9]. Moreover, several nations have also suffered from economic recessions as a  
65 result of the adverse distress of COVID-19 on the economy, leading to loss of employment or  
66 reduction in income which could negatively affect mental health [10].

67 Gender differences in mental health may exist between males and females, with females  
68 observed to have a higher prevalence in mental health disorders compared to males. This may be  
69 because females are exposed to risk factors such as gender inequality, gender-based violence and  
70 gender discrimination [11]. A mental health survey carried out in Lagos State Nigeria for the  
71 assessment of mental health disorder symptoms, revealed significant gender differences with  
72 females showing higher prevalence [12]. Since strategies for identification, prevention and  
73 treatment of mental disorders may be based on gender [13], there is a need for a gender specific  
74 study when measuring the psychological distress of any population.

75 Previous studies have shown that the predisposing factors to mental health disorders are gender  
76 specific [14-17]. It would prove interesting to see if a large scale stressor such as the pandemic  
77 will cause a change in the psychological distress between males and females and help us know if  
78 these variances can be characterized as COVID-19 related, hence this study.

79 This study assessed and compared the psychological distress of COVID-19 among male and  
80 female medical students in medical schools in South-Western Nigeria. It also assessed the risk  
81 factors associated with psychological distress among male and female medical students. It is

82 hoped that the study findings will be useful for policy makers in the educational sector and  
83 provide information useful in tailoring the medical curriculum to suit the peculiar needs of  
84 medical students during and after the COVID-19 pandemic.

85

86

## 87 **Materials and methods**

88 This was a descriptive cross-sectional study that compared the psychological distress between  
89 male and female medical students of the three largest Colleges of Medicine in the South-western  
90 regions of Nigeria. The Colleges are: College of Medicine, University of Ibadan (COMUI),  
91 College of Medicine, University of Lagos (CMUL) and Lagos University Teaching Hospital  
92 (LASUCOM). Purposive sampling was used to select the three largest medical schools in South-  
93 western Nigeria, which the study was carried out. Convenience sampling method was used in  
94 recruiting eligible male and female respondents (medical and dental undergraduates of the three  
95 universities), who participated in the study.

## 96 **Data collection**

97 This survey was conducted from June 22 to July 16, 2020. This was about 4-5 months after the  
98 first case of COVID-19 were reported in Nigeria. Because it was not feasible to do a face-face  
99 sampling survey during the on-going pandemic, data was collected using an online survey  
100 platform (Google forms <https://forms.gle/19yfEzehJKwsme759>). Relying on the authors'  
101 networks with colleagues in the three universities, a recruitment poster was created and posted to

102 the class online platform in the three colleges. This poster contained a brief introduction on the  
103 background, voluntary nature of participation, declarations of anonymity and confidentiality, as  
104 well as the link code of the online questionnaire. Persons, who are medical students of the three  
105 colleges, understood the content of the poster and agreed to participate in the study were  
106 instructed to complete the questionnaire by clicking the link.

## 107 **Survey instrument**

108 The General Health Questionnaire (GHQ-12), a self-administered screening tool was used to  
109 assess individuals with psychological distress [18]. It was developed in 1970 by Sir David  
110 Goldberg and Paul Williams [19]; the twelve item GHQ-12 is the most extensively used  
111 screening instrument for common mental disorders, in addition to being a more general measure  
112 of psychiatric well-being. It assesses the severity of mental problems over the past few weeks. Its  
113 brevity makes it attractive for use [18,19]. Its psychometric properties have been studied in  
114 various countries and in several sub-populations, including in Nigeria [20,21].

## 115 **GHQ scoring**

116 The bimodal scale was used in this study to grade the participants risk of psychological distress  
117 during the pandemic, with a score of 0 given to the ‘Not at all’ and ‘No more than usual’  
118 responses while a score of 1 is given to the ‘Same as usual’ and ‘much less than usual’ response.  
119 A total summation of the scores between 0 and 12 was collated for the responses selected by  
120 each participants, scores  $\leq 2$  implies that the participants have ‘No risk of psychological  
121 distress’, whereas scores  $\geq 3$  implies that participants are ‘At risk of psychological distress’.

122

## 123 **Data analysis**

124 Data collected was analyzed with SPSS 21 statistical software for windows (version 21.0 SPSS  
125 Inc, Chicago IL). Categorical variables were expressed in frequency tables with the  
126 corresponding percentages while normally distributed continuous variables were expressed as  
127 means and standard deviations. Chi square was used to assess gender differences in categorical  
128 and continuous variables respectively. A multivariate regression analysis was used to identify the  
129 predictors of psychological distress first among the general participants, and subsequently for  
130 males and females separately. p values of <0.05 were considered statistically significant

131 Ethical considerations: Ethical approval was obtained from Research and Ethics Committee of  
132 the Lagos University Teaching Hospital, with HREC assigned number:  
133 LUTHHREC/EREV/0620/56. Informed consent (online) was obtained from the participants  
134 before the commencement of the study. Participation was voluntary and Confidentiality assured  
135 to all respondents. Data was stored anonymously in a password-protected database

## 136 **Results**

137 The socio-demographic characteristics of study participants are shown in Table 1. The total  
138 number of data collected for male respondents was 486 and that of females, 524.

139 **Table 1: Socio-demographics of Male and Female Participants**

| <b>Variables</b> | <b>Male<br/>n=486</b> | <b>Female<br/>n=524</b> | <b>Total</b> | <b>Chi-square<br/>p value</b> |
|------------------|-----------------------|-------------------------|--------------|-------------------------------|
|                  | <b>Frequency (%)</b>  | <b>Frequency (%)</b>    |              | <b>(X<sup>2</sup>)</b>        |

|                                                          |                    |                    |           |                                                     |
|----------------------------------------------------------|--------------------|--------------------|-----------|-----------------------------------------------------|
| <b>Age group</b>                                         |                    |                    |           |                                                     |
| 15-19                                                    | 82 (37.3)          | 138 (62.7)         | 220 (100) | <b>X<sup>2</sup>= 35.386</b><br><b>p=&lt; 0.001</b> |
| 20-24                                                    | 308 (47.4)         | 342 (52.6)         | 650 (100) |                                                     |
| 25-29                                                    | 75 (67.0)          | 37 (33.0)          | 112 (100) |                                                     |
| 30-34                                                    | 18 (72.0)          | 7 (28.0)           | 25 (100)  |                                                     |
| 35-39                                                    | 3 (3.0)            | 0 (0.0)            | 3 (100)   |                                                     |
| <i>Mean ± SD =</i>                                       | <i>22.43±3.221</i> | <i>21.28±2.523</i> |           |                                                     |
| <b>Ethnicity</b>                                         |                    |                    |           |                                                     |
| Yoruba                                                   | 362 (48.9)         | 379 (51.1)         | 741 (100) | <b>X<sup>2</sup>= 36.645</b><br><b>p= 0.223</b>     |
| Igbo                                                     | 82 (46.6)          | 94 (53.4)          | 176 (100) |                                                     |
| Hausa                                                    | 3 (3.0)            | 0 (0.0)            | 3 (100)   |                                                     |
| Edo                                                      | 12 (42.9)          | 16 (57.1)          | 28 (100)  |                                                     |
| Others                                                   | 27 (55.6)          | 35 (66.8)          | 62 (100)  |                                                     |
| <b>Religion</b>                                          |                    |                    |           |                                                     |
| Christianity                                             | 400 (46.6)         | 459 (53.4)         | 859 (100) | <b>X<sup>2</sup>= 5.913</b><br><b>p= 0.052</b>      |
| Islam                                                    | 80 (56.3)          | 62 (43.7)          | 142 (100) |                                                     |
| Others                                                   | 6 (66.7)           | 3 (33.3)           | 9 (100)   |                                                     |
| <b>Institution</b>                                       |                    |                    |           |                                                     |
| COMUI                                                    | 169 (56.5)         | 130 (43.5)         | 299 (100) | <b>X<sup>2</sup>= 12.028</b><br><b>p= 0.002</b>     |
| CMUL                                                     | 182 (44.4)         | 228 (55.6)         | 410 (100) |                                                     |
| LASUCOM                                                  | 135 (43.9)         | 166 (55.1)         | 301 (100) |                                                     |
| <b>Level</b>                                             |                    |                    |           |                                                     |
| Preclinical                                              | 199 (48.5)         | 211 (51.4)         | 410 (100) | <b>X<sup>2</sup>= 4.636</b><br><b>p= 0.328</b>      |
| Clinical                                                 | 287 (47.8)         | 313 (52.2)         | 600 (100) |                                                     |
| <b>Marital Status</b>                                    |                    |                    |           |                                                     |
| Single                                                   | 478 (48.3)         | 511 (51.7)         | 989 (100) | <b>X<sup>2</sup>= 0.958</b><br><b>p= 0.619</b>      |
| Married                                                  | 8 (64.3)           | 13 (35.7)          | 21 (100)  |                                                     |
| <b>Family Monthly income</b>                             |                    |                    |           |                                                     |
| <33,000                                                  | 86 (51.2)          | 82 (48.8)          | 168 (100) | <b>X<sup>2</sup>= 3.425</b><br><b>p= 0.331</b>      |
| 33,000-50,000                                            | 75 (52.4)          | 68 (47.6)          | 143 (100) |                                                     |
| 50,000-100,000                                           | 97 (49.5)          | 99 (50.5)          | 196 (100) |                                                     |
| >100,000                                                 | 228 (45.3)         | 275 (54.7)         | 503 (100) |                                                     |
| <b>Have you ever been diagnosed of a mental illness</b>  |                    |                    |           |                                                     |
| Yes                                                      | 10 (34.5)          | 19 (65.5)          | 29 (100)  | <b>X<sup>2</sup>= 2.224</b><br><b>p= 0.136</b>      |
| No                                                       | 476 (48.5)         | 505 (51.5)         | 981 (100) |                                                     |
| <b>Do you have a Relative/Acquaintance with COVID 19</b> |                    |                    |           |                                                     |
| Yes                                                      | 36 (35.3)          | 66 (64.7)          | 102 (100) | <b>X<sup>2</sup>= 7.475</b><br><b>p= 0.006</b>      |
| No                                                       | 450 (49.6)         | 458 (50.4)         | 908 (100) |                                                     |

140 Abbreviations: SD Standard deviation, COMUI College of Medicine, University of Ibadan, CMUL College of  
 141 Medicine, University of Lagos, LASUCOM Lagos State University Teaching Hospital.

142



143 The mean age of female respondents was  $21.28 \pm 2.5$  years and made up more than half (54.7%)  
 144 of respondents who had a family monthly income greater than 100,000 naira. More females  
 145 (65.5%) constitute the group of respondents who reported to have been previously diagnosed  
 146 with a mental condition and also made up 64.7% of respondents who had a relative/acquaintance  
 147 diagnosed of COVID-19. In comparison, the mean age of males was  $22.43 \pm 3.2$  years which were  
 148 higher than the mean age of females. Male respondents constitute less than half (45.3%) of  
 149 respondents who had a family income greater than 100,000 naira. Fewer male (34.5%)  
 150 constituted the group of respondents' who reported having ever been diagnosed of a mental  
 151 illness and males made up 35.3% of respondents who had relatives/acquaintances diagnosed of  
 152 COVID-19 as compared to females who made up majority (65.5% and 64.7% respectively) of  
 153 both groups.

## 154 Psychological distress assessment

155 From the results in Table 2, more females reported they had *lost much sleep over worry* (53.9%),  
 156 *been feeling depressed* (56.2%) and *been thinking of themselves as worthless* (54.1%), 'Rather  
 157 more than usual', than the male gender (46.1%, 43.8% and 45.9% respectively).

158 **Table 2: Responses of the participants to GHQ-12 Questions.**

159 *Have you during the COVID-19 pandemic:*

| Statement                                            | Male<br>n (%) | Female<br>n (%) | Total     | Chi-square<br>p value              |
|------------------------------------------------------|---------------|-----------------|-----------|------------------------------------|
| <b>Been able to concentrate on what you're doing</b> |               |                 |           |                                    |
| Better than usual                                    | 331 (48.4)    | 353 (51.6)      | 684 (100) | X <sup>2</sup> = 0.339<br>p= 0.593 |
| Same as usual                                        | 119 (48.1)    | 127 (51.6)      | 246 (100) |                                    |
| Less than usual                                      | 27 (45.0)     | 33 (55.0)       | 60 (100)  |                                    |
| Much less than usual                                 | 9 (45.0)      | 11 (55.0)       | 20 (100)  |                                    |
| <b>Lost much sleep over worry</b>                    |               |                 |           |                                    |
| Not at all                                           | 79 (49.4)     | 81 (50.6)       | 160 (100) | X <sup>2</sup> = 0.288<br>p= 0.962 |
| No more than usual                                   | 251 (48.3)    | 269 (51.7)      | 520 (100) |                                    |
| Rather more than usual                               | 129 (46.9)    | 146 (53.1)      | 275 (100) |                                    |

|                                                             |             |            |           |                            |
|-------------------------------------------------------------|-------------|------------|-----------|----------------------------|
| Much more than usual                                        | 27 (49.1)   | 28 (50.9)  | 55 (100)  |                            |
| <b>Felt that you're playing a useful part in things</b>     |             |            |           |                            |
| More than usual                                             | 90 (49.2)   | 93 (50.8)  | 183 (100) | $X^2= 0.309$<br>$p= 0.958$ |
| Same as usual                                               | 239 (48.2)  | 257 (51.8) | 496 (100) |                            |
| Less than usual                                             | 117 (46.2)  | 133 (53.8) | 250 (100) |                            |
| Much less than usual                                        | 40 (49.4)   | 41 (50.6)  | 81 (100)  |                            |
| <b>Felt capable of making decisions about things</b>        |             |            |           |                            |
| More than usual                                             | 114 (47.1)  | 128 (52.9) | 242 (100) | $X^2=3.957$<br>$p=0.266$   |
| Same as usual                                               | 320 (47.8)  | 349 (52.2) | 669 (100) |                            |
| Less than usual                                             | 38 (48.1)   | 41 (51.9)  | 79 (100)  |                            |
| Much less than usual                                        | 14 (70.0)   | 6 (30.0)   | 20 (100)  |                            |
| <b>Felt constantly under strain</b>                         |             |            |           |                            |
| Not at all                                                  | 188 (48.2)  | 202 (51.8) | 390 (100) | $X^2= 0.232$<br>$p= 0.972$ |
| No more than usual                                          | 194 (47.4)  | 215 (52.6) | 409 (100) |                            |
| Rather more than usual                                      | 78 (49.7)   | 79 (50.3)  | 157 (100) |                            |
| Much more than usual                                        | 26 (48.1)   | 28 (51.9)  | 54 (100)  |                            |
| <b>Felt you could not overcome your difficulties</b>        |             |            |           |                            |
| Not at all                                                  | 301 (48.1)  | 325 (51.9) | 626 (100) | $X^2= 0.589$<br>$p= 0.899$ |
| No more than usual                                          | 136 (47.9)  | 148 (52.1) | 284 (100) |                            |
| Rather more than usual                                      | 36 (51.4)   | 34 (48.6)  | 70 (100)  |                            |
| Much more than usual                                        | 13 (43.3)   | 17 (56.7)  | 13 (100)  |                            |
| <b>Been able to enjoy your normal day to day activities</b> |             |            |           |                            |
| More than usual                                             | 85 (47.0)   | 96 (53.0)  | 181 (100) | $X^2=2.634$<br>$p= 0.451$  |
| Same as usual                                               | 243 (47.6)  | 268 (52.4) | 511 (100) |                            |
| Less than usual                                             | 135 (48.3)  | 126 (51.7) | 261 (100) |                            |
| Much less than usual                                        | 23 (48.2)   | 33 (41.8)  | 56 (100)  |                            |
| <b>Been able to face up your problems</b>                   |             |            |           |                            |
| More than usual                                             | 103 (47.5)  | 114 (52.5) | 217 (100) | $X^2= 1.009$<br>$p= 0.799$ |
| Same as usual                                               | 315 (49.1)  | 326 (50.9) | 641 (100) |                            |
| Less than usual                                             | 57 (44.9)   | 70 (55.1)  | 127 (100) |                            |
| Much less than usual                                        | 11 (44.0)   | 14 (56.0)  | 25 (100)  |                            |
| <b>Been feeling unhappy or depressed</b>                    |             |            |           |                            |
| Not at all                                                  | 250 (47.6)  | 275 (52.4) | 525 (100) | $X^2= 3.896$<br>$p= 0.273$ |
| No more than usual                                          | 149 (48.9)  | 156 (51.1) | 305 (100) |                            |
| Rather more than usual                                      | 57 (43.8)   | 73 (56.2)  | 130 (100) |                            |
| Much more than usual                                        | 30 (40.0)   | 20 (60.0)  | 50 (100)  |                            |
| <b>Been losing confidence in yourself</b>                   |             |            |           |                            |
| Not at all                                                  | 298 (47.8)  | 325 (52.2) | 623 (100) | $X^2= 0.304$<br>$p= 0.959$ |
| No more than usual                                          | 121 (49.6)  | 123 (50.4) | 244 (100) |                            |
| Rather more than usual                                      | 49 9 (47.6) | 54 (52.4)  | 103 (100) |                            |
| Much more than usual                                        | 18 (46.2)   | 21 (53.8)  | 39 (100)  |                            |
| <b>Been thinking of yourself as a worthless person</b>      |             |            |           |                            |
| Not at all                                                  | 383 (48.4)  | 408 (51.6) | 791 (100) | $X^2= 0.241$<br>$p= 0.971$ |
| No more than usual                                          | 64 9 (47.1) | 72 (52.9)  | 136 (100) |                            |
| Rather more than usual                                      | 28 (45.9)   | 33 (54.1)  | 61 (100)  |                            |
| Much more than usual                                        | 11 (48.1)   | 11 (51.9)  | 22 (100)  |                            |
| <b>Been feeling reasonably happy all things considered</b>  |             |            |           |                            |
|                                                             | 105 (49.3)  | 108 (50.7) | 213 (100) |                            |

|                      |            |            |           |                            |
|----------------------|------------|------------|-----------|----------------------------|
| More than usual      | 291 (47.0) | 328 (53.0) | 619 (100) | $X^2= 1.090$<br>$p= 0.780$ |
| Same as usual        | 71 (49.7)  | 72 (50.3)  | 143 (100) |                            |
| Less than usual      | 19 (54.3)  | 16 (45.7)  | 35 (100)  |                            |
| Much less than usual |            |            |           |                            |

160

161

## 162 Risk of psychological distress

163 Results from Table 3 showed that almost a third (31.4%) of the respondents were at risk of  
 164 psychological distress and females constituted majority(60.3 %)as compared to their Male  
 165 counterparts (39.7%) this was statistically significant ( $p < 0.001$ )

166

167 **Table 3: Respondents showing risk of Psychological distress**

| Risk of Psychological distress | Male n (%) | Female n (%) | Total      | Chi-square<br>p value        |
|--------------------------------|------------|--------------|------------|------------------------------|
| No risk                        | 360 (58.9) | 333 (8.9)    | 693 (100)  | $X^2= 12.969$<br>$p= <0.001$ |
| At risk                        | 126 (39.7) | 191 (60.3)   | 317 (100)  |                              |
| Total                          | 486 (48.1) | 524 (51.9)   | 1010 (100) |                              |

168

169

## 170 Predictors of psychological distress among all respondents

171 From Table 4; Age (OR=0.929,  $p=0.016$ ), female gender (OR=1.534, 95%  $p=0.003$ ), family  
 172 monthly income greater than 50,000 naira (OR=1.378,  $p=0.023$ ), and positive history of mental  
 173 illness (OR=3.077,  $p=0.004$ ) were independently associated with the risk of psychological  
 174 distress among all respondents in general.

175 **Table 4: Socio-demographics and predictors of psychological distress among all respondents**

| Variables                                 | Adjusted OR | Std. err. | z score | p value      | 95% CI      |
|-------------------------------------------|-------------|-----------|---------|--------------|-------------|
| <b>Constant</b>                           | 1.291       | 0.924     | 0.38    | 0.721        | 1.317-5.252 |
| <b>Age in years</b>                       | 0.929       | 0.028     | -2.40   | <b>0.016</b> | 0.875-0.986 |
| <b>Female gender</b>                      | 1.534       | 0.022     | 2.98    | <b>0.003</b> | 1.158-2.032 |
| <b>Level of Study</b>                     |             |           |         |              |             |
| Clinical                                  | 1.313       | 0.216     | 1.66    | 0.097        | 0.951-1.811 |
| <b>Family monthly income</b>              |             |           |         |              |             |
| >50,000 naira                             | 1.378       | 0.194     | 2.28    | <b>0.023</b> | 1.045-1.816 |
| <b>Positive history of mental illness</b> | 3.077       | 1.202     | 2.88    | <b>0.004</b> | 1.430-6.615 |

176 Abbreviations: OR odds ratio, Std. err. Standard error, CI confidence interval. Constant estimates baseline odds

177

178 **Predictors of psychological distress among female respondents**

179 Table 5 shows that *age* (OR=0.896, p=0.025), *family income greater than #50,000* (OR=0.530,  
 180 p=0.001) and *positive history of mental illness* (OR=5.102, p=0.002) were independently  
 181 associated with the risk of psychological distress among female participants.

182 **Table 5: Socio-demographics and predictors of psychological distress among female respondents**

| Variables                                 | Adjusted OR | Std. err. | z score | p value      | 95% CI       |
|-------------------------------------------|-------------|-----------|---------|--------------|--------------|
| <b>Constant</b>                           | 7.197       | 7.996     | 1.78    | 0.076        | 0.816-63.499 |
| <b>Age in years</b>                       | 0.896       | 0.044     | -2.25   | <b>0.025</b> | 0.814-0.986  |
| <b>Level of Study</b>                     |             |           |         |              |              |
| Clinical                                  | 1.156       | 0.271     | 0.62    | 0.535        | 0.731-1.829  |
| <b>Family monthly income</b>              |             |           |         |              |              |
| >50,000 naira                             | 0.530       | 0.101     | -3.35   | <b>0.001</b> | 0.366-0.769  |
| <b>Positive history of mental illness</b> | 5.102       | 2.647     | 3.14    | <b>0.002</b> | 1.845-14.106 |

183 Abbreviations: OR odds ratio, Std. err. Standard error, CI confidence interval. Constant estimates baseline odds

184

185 **Predictors of psychological distress among male respondents**

186 From Table 6, there was no socio-demographic factor independently associated with the risk of  
187 psychological effects among male participants.

188 **Table 6: Socio-demographics and predictors of psychological distress among male respondents**

| <b>Variables</b>                          | <b>Adjusted OR</b> | <b>Std. err.</b> | <b>z score</b> | <b>p value</b> | <b>95% CI</b> |
|-------------------------------------------|--------------------|------------------|----------------|----------------|---------------|
| <b>Constant</b>                           | 0.662              | 0.626            | -0.04          | 0.663          | 0.103-4.230   |
| <b>Age in years</b>                       | 0.963              | 0.038            | -0.97          | 0.330          | 0.892-1.039   |
| <b>Level of Study</b>                     |                    |                  |                |                |               |
| Clinical                                  | 1.490              | 0.355            | 1.68           | 0.094          | 0.934-2.377   |
| <b>Family monthly income</b>              |                    |                  |                |                |               |
| >50,000 naira                             | 1.058              | 0.225            | 0.26           | 0.792          | 0.696-1.606   |
| <b>Positive history of mental illness</b> | 1.452              | 0.647            | 0.53           | 0.599          | 0.362-5.830   |

189 Abbreviations: OR odds ratio, Std. err. Standard error, CI confidence interval. Constant estimates baseline odds

190

191 Female respondents had higher risk of psychological distress compared to males. However, the  
192 predictors of psychological distress among the female participants are age, family income greater  
193 than 50,000 naira and a positive history of mental health condition. Whereas, there was no  
194 predictor of psychological distress among male respondents.

195

196

197

198

199

## 200 **Discussion**

201 The findings our study showed that the pandemic had a negative psychological impact on the  
202 respondents and agrees with Gupta et al, which stated that the negative psychological impact on  
203 the participants was greater during the lockdown due to COVID-19 pandemic [22]. From their  
204 survey, it was reported that the pandemic and lockdown increased mental morbidity among the  
205 general public [22] and the number of increasing cases resulted in an extension of the lockdown  
206 and curfews [22]. However, the results from our study and that of Gupta et al, contradict the  
207 claims of Yun Li et al [23] where all participants had low mean scores for anxiety and  
208 depression. This reason for this unusual finding may be because, as at the time of study, the  
209 number of COVID-19 cases was fewer compared to the latter period.

210 Our study reports that there is a significant gender difference in the psychological distress on  
211 medical students with females constituting a majority (60%) of the population at risk of  
212 psychological distress, this finding agrees with existing evidence from Ochilbek et al, which  
213 stated that females were at a higher risk of psychological distress than males [24]. In the study by  
214 Ochilbek and Senol, there was a significant gender difference as women had higher anxiety and  
215 depression scores than men which confirm our results. The findings from our study further  
216 supports a study by Rodríguez-Rey et al which also revealed women showed significantly higher  
217 levels in anxiety, stress and depression [25]. In addition, a similar survey by Li G et al found out  
218 that female healthcare workers were more exposed to the psychological threat of COVID-19 than  
219 male healthcare workers [26]. However, the significant gender difference in this study is in  
220 contrast with findings from a similar pre-pandemic study which showed gender not to be

221 significant in the psychological impact on the students. This may be because their study was  
222 done in the absence of a large scale stressor such as the pandemic [27].

223 Our results from the regression analysis indicated that female participants with family income  
224 greater than #50,000 are at risk of psychological distress compared to female participants who  
225 had lower family income. This is consistent with the study by Tull et al which discovered that  
226 income level was uniquely inversely associated with anxiety, financial worry and loneliness  
227 during the COVID-19 pandemic [28]. Our study also agrees with Saurabh et al which found out  
228 that the psychological problems of children and adolescents was mainly associated with loss of  
229 father's job, financial losses of family and unavailability of basic life needs [29].

230 Furthermore, our regression analysis showed that female respondents who have been previously  
231 diagnosed with a mental disorder are also at increased risk of psychological distress, compared to  
232 female respondents who have never been diagnosed of a mental health condition. This finding  
233 further buttresses the theory that there is an association between mental disorders and stressful  
234 events.

235 This study is among the first few gender comparative studies in Nigeria that assessed the  
236 psychological distress of the COVID-19 pandemic on medical students, it also features a large  
237 sample size of 1010 distress among Nigerian medical students. However it has some limitations  
238 and the findings should be interpreted with some caution.

239 Information obtained was collected using an online self-administered questionnaire indicating  
240 the possibility of selection bias. Furthermore, the results cannot be generalized to the  
241 entire country because it was limited to participants in three universities only in the South West  
242 region of Nigeria. There is also a possibility for recall bias and causal inferences cannot be made  
243 since due to the cross-sectional nature of the study

244 A more representative sample and a broader study involving colleges of medicine across the  
245 entire country would provide more generalized and accurate estimate of the gender comparison  
246 of the psychological distress of COVID-19 in medical students.

247

## 248 **Conclusion**

249 Females were at higher risk of psychological distress compared to male students emphasizing the  
250 need for gender specific interventions for psychological distress among medical students. Also,  
251 future research to establish the long term psychological effects of the COVID-19 pandemic on  
252 medical students is recommended.

253

## 254 **Acknowledgement**

255 We appreciate Ademuyiwa EA, Bankole OM, Oaikhina OI , Dairo OO, Adetoye TA, Oyenuga  
256 OO, Owate OO, Kadiri NA and Oloyede OV, who assisted in data collection across the three  
257 colleges. Adesanya OA, Anibaba OM, Fashina IO, for providing technical help and general  
258 support, and Dr. Ogunyemi AO, for providing writing assistance.

259

## 260 **References**

- 261 1. He F, Deng Y, Li W. Coronavirus disease 2019: What we know? *J Med Virol*. 2020  
262 Jul;92(7):719-725. doi: 10.1002/jmv.25766. Epub 2020 Mar 28. PMID: 32170865; PMCID:  
263 PMC7228340.
- 264 2. Cucinotta D, Vanelli M. WHO Declares COVID-19 a Pandemic. *Acta Biomed*. 2020 Mar  
265 19;91(1):157-160. doi: 10.23750/abm.v91i1.9397. PMID: 32191675; PMCID: PMC7569573.



- 266 3. Coronavirus Disease (COVID-19) Situation Reports. Who.int. 2020. Available from:  
267 <https://www.who.int/emergencies/diseases/novel-coronavirus-2019/situation-reports>.  
268 [Accessed 26th August 2020].
- 269 4. Adegboye OA, Adekunle AI, Gayawan E. Early Transmission Dynamics of Novel  
270 Coronavirus (COVID-19) in Nigeria. *Int J Environ Res Public Health*. 2020 Apr  
271 28;17(9):3054. doi: 10.3390/ijerph17093054. PMID: 32353991; PMCID: PMC7246526.
- 272 5. NCDC COVID-19 NIGERIA. [www.covid19.ncdc.gov.ng](http://www.covid19.ncdc.gov.ng) [Accessed 28th August 2020]
- 273 6. Adam Felman. Mental health: Definition, common disorders, early signs, and more. *Medical*  
274 *news today*. 2020. Available from: [https://www.medicalnewstoday.com/articles/154543#risk-](https://www.medicalnewstoday.com/articles/154543#risk-factors)  
275 [factors](https://www.medicalnewstoday.com/articles/154543#risk-factors). [Accessed 30th August 2020].
- 276 7. Allen J, Balfour R, Bell R, Marmot M. Social determinants of mental health. *Int Rev*  
277 *Psychiatry*. 2014 Aug;26(4):392-407. doi: 10.3109/09540261.2014.928270. PMID:  
278 25137105.
- 279 8. Kawachi I, Berkman LF. Social ties and mental health. *J Urban Health*. 2001 Sep;78(3):458-  
280 67. doi: 10.1093/jurban/78.3.458. PMID: 11564849; PMCID: PMC3455910.
- 281 9. Vahedi S. World Health Organization Quality-of-Life Scale (WHOQOL-BREF): Analyses of  
282 Their Item Response Theory Properties Based on the Graded Responses Model. *Iran J*  
283 *Psychiatry*. 2010 Fall;5(4):140-53. PMID: 22952508; PMCID: PMC3395923.
- 284 10. Richard B, Beatrice W. *Economics in the time of COVID-19*. 1st ed. London, UK: Centre for  
285 Economic Policy Research: A CEPR Press VoxEU.org eBook; 2020.
- 286 11. Afifi M. Gender differences in mental health. *Singapore Med J*. 2007 May;48(5):385-91.  
287 PMID: 17453094.
- 288 12. Adewuya AO, Coker OA, Atilola O, Ola BA, Zachariah MP, Adewumi T, et al. Gender  
289 difference in the point prevalence, symptoms, comorbidity, and correlates of depression:  
290 findings from the Lagos State Mental Health Survey (LSMHS), Nigeria. *Arch Womens Ment*

- 291 Health. 2018 Dec;21(6):591-599. doi: 10.1007/s00737-018-0839-9. Epub 2018 Mar 28.  
292 PMID: 29594370.
- 293 13. Riecher-Rössler A. Sex and gender differences in mental disorders. *Lancet Psychiatry*. 2017  
294 Jan;4(1):8-9. doi: 10.1016/S2215-0366(16)30348-0. Epub 2016 Nov 15. PMID: 27856397.
- 295 14. Matud MP, Bethencourt JM, Ibáñez I. Gender differences in psychological distress in Spain.  
296 *Int J Soc Psychiatry*. 2015 Sep;61(6):560-8. doi: 10.1177/0020764014564801. Epub 2014  
297 Dec 22. PMID: 25534418.
- 298 15. Watkins DC, Johnson NC. Age and Gender Differences in Psychological Distress among  
299 African Americans and Whites: Findings from the 2016 National Health Interview Survey.  
300 *Healthcare (Basel)*. 2018 Jan 17;6(1):6. doi: 10.3390/healthcare6010006. PMID: 29342081;  
301 PMCID: PMC5872213.
- 302 16. Roothman B, Kirsten DK, Wissing MP. Gender Differences in Aspects of Psychological  
303 Well-Being. *South African Journal of Psychology*. 2003;33(4):212-218.  
304 doi:10.1177/008124630303300403
- 305 17. Siddiqui R, Ara A, Hassan A. Gender Differences on Perceived Social Support and  
306 Psychological Distress among University Students. *GMJ ACS*. 2020;9(2):210-24.
- 307 18. Goldberg DP, Hillier VF. A scaled version of the General Health Questionnaire. *Psychol*  
308 *Med*. 1979 Feb;9(1):139-45. doi: 10.1017/s0033291700021644. PMID: 424481.
- 309 19. Werneke U, Goldberg DP, Yalcin I, Ustün BT. The stability of the factor structure of the  
310 General Health Questionnaire. *Psychol Med*. 2000 Jul;30(4):823-9. doi:  
311 10.1017/s0033291799002287. PMID: 11037090.
- 312 20. Gureje O, Obikoya B. The GHQ-12 as a screening tool in a primary care setting. *Soc*  
313 *Psychiatry Psychiatr Epidemiol*. 1990 Sep;25(5):276-80. doi: 10.1007/BF00788650. PMID:  
314 2237610.

- 315 21. Goldberg DP, Gater R, Sartorius N, Ustun TB, Piccinelli M, Gureje O, Rutter C. The validity  
316 of two versions of the GHQ in the WHO study of mental illness in general health care.  
317 Psychol Med. 1997 Jan;27(1):191-7. doi: 10.1017/s0033291796004242. PMID: 9122299.
- 318 22. Gupta AK, Sahoo S, Mehra A, Grover S. Psychological impact of 'Lockdown' due to  
319 COVID-19 pandemic in Nepal: An online survey. Asian J Psychiatr. 2020 Jun 20;54:102243.  
320 doi: 10.1016/j.ajp.2020.102243. Epub ahead of print. PMID: 32619836; PMCID:  
321 PMC7305731.
- 322 23. Li HY, Cao H, Leung DYP, Mak YW. The Psychological Impacts of a COVID-19 Outbreak  
323 on College Students in China: A Longitudinal Study. Int J Environ Res Public Health. 2020  
324 Jun 2;17(11):3933. doi: 10.3390/ijerph17113933. PMID: 32498267; PMCID: PMC7312488.
- 325 24. Ochilbe R, Senol D. Knowledge and Anxiety Levels of African University Students Against  
326 COVID-19 During the Pandemic Outbreak by an Online Survey, J Res Med Dent Sci, 2020,  
327 8(3): 53-56
- 328 25. Rodríguez-Rey R, Garrido-Hernansaiz H, Collado S. Psychological Impact and Associated  
329 Factors During the Initial Stage of the Coronavirus (COVID-19) Pandemic Among the  
330 General Population in Spain. Front Psychol. 2020 Jun 23;11:1540. doi:  
331 10.3389/fpsyg.2020.01540. PMID: 32655463; PMCID: PMC7325630.
- 332 26. Li G, Miao J, Wang H, Xu S, Sun W, Fan Y, Zhang C, Zhu S, Zhu Z, Wang W.  
333 Psychological impact on women health workers involved in COVID-19 outbreak in Wuhan: a  
334 cross-sectional study. J Neurol Neurosurg Psychiatry. 2020 Aug;91(8):895-897. doi:  
335 10.1136/jnnp-2020-323134. Epub 2020 May 4. PMID: 32366684.
- 336 27. Omigbodun OO, Odukogbe AT, Omigbodun AO, Yusuf OB, Bella TT, Olayemi O. Stressors  
337 and psychological symptoms in students of medicine and allied health professions in Nigeria.  
338 Soc Psychiatry Psychiatr Epidemiol. 2006 May;41(5):415-21. doi: 10.1007/s00127-006-  
339 0037-3. Epub 2006 Feb 14. PMID: 16479325.

340 28. Tull MT, Edmonds KA, Scamaldo KM, Richmond JR, Rose JP, Gratz KL. Psychological  
341 Outcomes Associated with Stay-at-Home Orders and the Perceived Impact of COVID-19 on  
342 Daily Life. *Psychiatry Res.* 2020 May 12;289:113098. doi: 10.1016/j.psychres.2020.113098.  
343 Epub ahead of print. PMID: 32434092; PMCID: PMC7252159.

344 29. Saurabh K, Ranjan S. Compliance and Psychological Impact of Quarantine in Children and  
345 Adolescents due to Covid-19 Pandemic. *Indian J Pediatr.* 2020 Jul;87(7):532-536. doi:  
346 10.1007/s12098-020-03347-3. Epub 2020 May 29. PMID: 32472347; PMCID:  
347 PMC7257353.

348  
349  
350  
351  
352  
353  
354  
355  
356  
357  
358  
359  
360  
361  
362  
363  
364  
365  
366

367

368

369

370

371

372

373

374

375

376

377

378

379

380

381

382

383

384

385

386

387

388

389
